# Supplementary material for: Controlling the aspect ratio and electrocatalytic properties of nickel cobaltite nanorods
Source: Royal Society of Chemistry journal article supplement (doi:10.1039/c3ra44156c), 2013-01-01
Supplement: c3ra44156c.pdf [file c3ra44156c.pdf]

## Supporting Information

# Controlling the aspect ratio and electrocatalytic properties of nickel cobaltite nanorods

*Neha Garg<sup>a</sup>, Mrinmoyee Basu<sup>a</sup>, Kishor Upadhyaya<sup>b</sup>, S.M. Shivaprasad<sup>b</sup> and A.K.Ganguli<sup>a, c,\*</sup>*

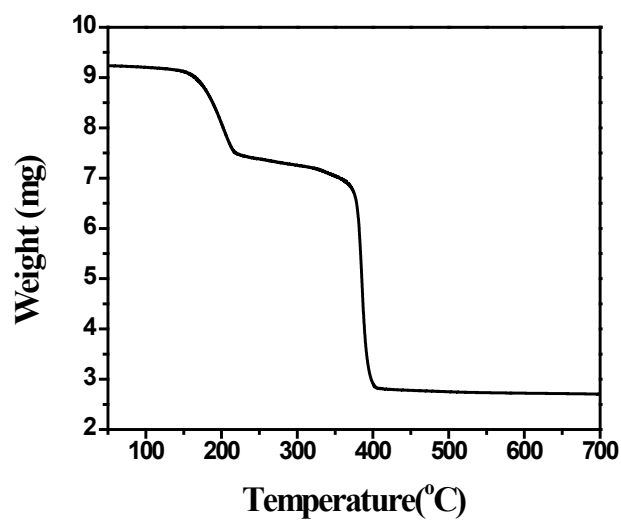

Figure S1. Thermo gravimetric analysis of oxalate precursor (NCO-1)

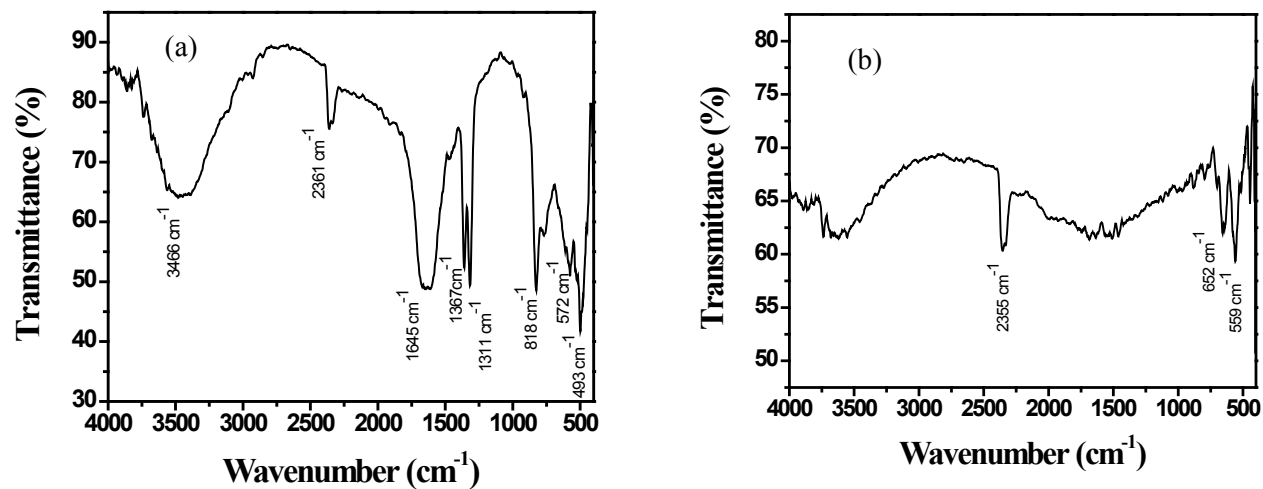

Figure S2. FTIR spectrum of (a) oxalate precursor (b)  $\text{NiCo}_2\text{O}_4$  nanostructures (NCO-2)

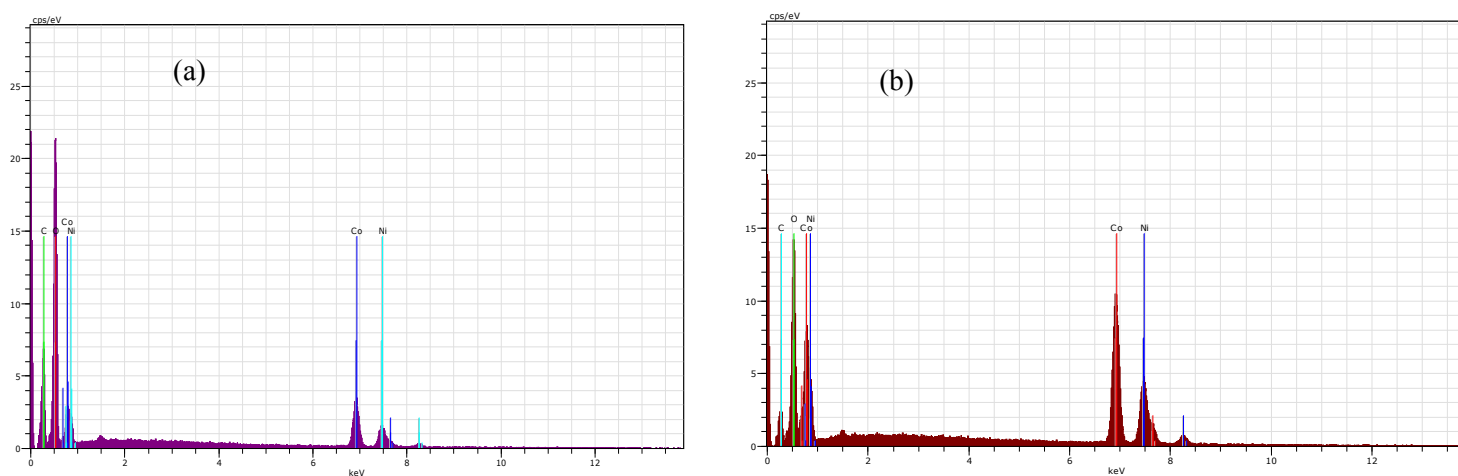

Figure S3. EDX spectrum of the (a) oxalate precursor (b)  $\text{NiCo}_2\text{O}_4$  nanorods (NCO-2)
